# Supplementary material for: Toxic Chemical Pollutants in the U.S. States
Source: Research Square preprint supplement (doi:10.21203/rs.3.rs-1627627/v1), 2022-05-13
Supplement: Supplementary file 1 [file 7ecb0f0ef310aa9128b1753b.docx]

**Supporting Information**

**Table S1**. Industrial sector classification in this study

| No. | Sector | NAICS |
| --- | --- | --- |
| 1 | Agriculture, Forestry, Fishing and Hunting | 11 |
| 2 | Mining, Quarrying, and Oil and Gas Extraction | 21 |
| 3 | Wind Electric Power Generation | 221115 |
| 4 | Other Utilities | 22 |
| 5 | Construction | 23 |
| 6 | Manufacturing | 31 - 33 |
| 7 | Wholesale Trade | 42 |
| 8 | Retail Trade | 44 - 45 |
| 9 | Transportation and Warehousing | 48 - 49 |
| 10 | Information | 51 |
| 11 | Finance and Insurance | 52 |
| 12 | Real Estate and Rental and Leasing | 53 |
| 13 | Professional, Scientific, and Technical Services | 54 |
| 14 | Waste Services | 56 |
| 15 | Educational Services | 61 |
| 16 | Health Care and Social Assistance | 62 |
| 17 | Arts, Entertainment, and Recreation | 71 |
| 18 | Accommodation and Food Services | 72 |
| 19 | Other Services (except Public Administration) | 81 |
| 20 | Public Administration | 92 |

**Table S2**. U.S. states considered in this study and their population in 2017

| No. | Region | Code | Population |
| --- | --- | --- | --- |
| 1 | Alabama | AL | 5024279 |
| 2 | Alaska | AK | 733391 |
| 3 | Arizona | AZ | 7151502 |
| 4 | Arkansas | AR | 3011524 |
| 5 | California | CA | 39538223 |
| 6 | Colorado | CO | 5773714 |
| 7 | Connecticut | CT | 3605944 |
| 8 | Delaware | DE | 989948 |
| 9 | District of Columbia | DC | 689545 |
| 10 | Florida | FL | 21538187 |
| 11 | Georgia | GA | 10711908 |
| 12 | Hawaii | HI | 1455271 |
| 13 | Idaho | ID | 1839106 |
| 14 | Illinois | IL | 12812508 |
| 15 | Indiana | IN | 6785528 |
| 16 | Iowa | IA | 3190369 |
| 17 | Kansas | KS | 2937880 |
| 18 | Kentucky | KY | 4505836 |
| 19 | Louisiana | LA | 4657757 |
| 20 | Maine | ME | 1362359 |
| 21 | Maryland | MD | 6177224 |
| 22 | Massachusetts | MA | 7029917 |
| 23 | Michigan | MI | 10077331 |
| 24 | Minnesota | MN | 5706494 |
| 25 | Mississippi | MS | 2961279 |
| 26 | Missouri | MO | 6154913 |
| 27 | Montana | MT | 1084225 |
| 28 | Nebraska | NE | 1961504 |
| 29 | Nevada | NV | 3104614 |
| 30 | New Hampshire | NH | 1377529 |
| 31 | New Jersey | NJ | 9288994 |
| 32 | New Mexico | NM | 2117522 |
| 33 | New York | NY | 20201249 |
| 34 | North Carolina | NC | 10439388 |
| 35 | North Dakota | ND | 779094 |
| 36 | Ohio | OH | 11799448 |
| 37 | Oklahoma | OK | 3959353 |
| 38 | Oregon | OR | 4237256 |
| 39 | Pennsylvania | PA | 13002700 |
| 40 | Rhode Island | RI | 1097379 |
| 41 | South Carolina | SC | 5118425 |
| 42 | South Dakota | SD | 886667 |
| 43 | Tennessee | TN | 6910840 |
| 44 | Texas | TX | 29145505 |
| 45 | Utah | UT | 3271616 |
| 46 | Vermont | VT | 643077 |
| 47 | Virginia | VA | 8631393 |
| 48 | Washington | WA | 7705281 |
| 49 | West Virginia | WV | 1793716 |
| 50 | Wisconsin | WI | 5893718 |
| 51 | Wyoming | WY | 576851 |
| 52 | Puerto Rico | PR | 3285874 |

Note: See United Census Bureau for the population data (<https://www.census.gov/library/visualizations/interactive/2020-population-and-housing-state-data.html>).

**Table S3**. RSEI risk of industrial sectors in Texas

|  |  | RSEI risk | | | | | | | |
| --- | --- | --- | --- | --- | --- | --- | --- | --- | --- |
| NAICS | Sector name | RSEI share | RSEI score | Chromium | Ethylene oxide | Cobalt | Nickel | Arsenic | Others |
| 311-312 | Food and beverage and tobacco product manufacturing | 0.02% | 18,939 | 0 | 0 | 0 | 0 | 0 | 18,939 |
| 313-314 | Textile mills and textile product mills | 0.00% | 3,212 | 0 | 0 | 0 | 0 | 0 | 3,212 |
| 315-316 | Apparel, leather, and allied product manufacturing | 0.00% | 3,201 | 3,158 | 0 | 0 | 0 | 0 | 43 |
| 321 | Wood product manufacturing | 0.01% | 10,206 | 30 | 0 | 0 | 0 | 865 | 9,310 |
| 322 | Paper manufacturing | 0.06% | 44,018 | 12,191 | 0 | 0 | 0 | 0 | 31,827 |
| 323 | Printing and related support activities | 0.00% | 63 | 0 | 0 | 0 | 0 | 0 | 63 |
| 324 | Petroleum and coal products manufacturing | 2.51% | 1,920,165 | 9,018 | 0 | 53,976 | 276,266 | 0 | 1,580,905 |
| 325 | Chemical manufacturing | 73.62% | 56,246,726 | 432,221 | 43,020,571 | ####### | 184,017 | 0 | ######## |
| 326 | Plastics and rubber products manufacturing | 0.07% | 55,080 | 7,751 | 0 | 0 | 69 | 0 | 47,259 |
| 327 | Nonmetallic mineral product manufacturing | 0.36% | 273,900 | 143,344 | 0 | 15,106 | 1,287 | 0 | 114,162 |
| 331 | Primary metal manufacturing | 2.10% | 1,604,052 | 1,027,829 | 0 | 74,421 | 129,021 | 93,751 | 279,030 |
| 332 | Fabricated metal product manufacturing | 4.31% | 3,291,158 | 2,759,259 | 0 | 53,442 | 261,214 | 0 | 217,244 |
| 333 | Machinery manufacturing | 9.40% | 7,180,110 | 4,785,464 | 0 | ####### | 423,132 | 0 | 9,167 |
| 334 | Computer and electronic product manufacturing | 0.11% | 80,531 | 73,278 | 0 | 0 | 1,847 | 0 | 5,406 |
| 335 | Electrical equipment, appliance, and component manufacturing | 0.49% | 373,956 | 226,244 | 0 | 0 | 121,928 | 0 | 25,785 |
| 3361-3363 | Motor vehicles, bodies and trailers, and parts manufacturing | 0.21% | 160,993 | 69,113 | 0 | 0 | 83,802 | 0 | 8,079 |
| 3364-3369 | Other transportation equipment manufacturing | 0.34% | 256,086 | 210,233 | 0 | 22,929 | 7,263 | 0 | 15,660 |
| 337 | Furniture and related product manufacturing | 0.00% | 1,232 | 1,073 | 0 | 0 | 147 | 0 | 12 |
| 339 | Miscellaneous manufacturing | 6.39% | 4,881,903 | 0 | 4,880,809 | 0 | 0 | 0 | 1,094 |

**Table S4**. RSEI risk of industrial sectors in Louisiana

|  |  | RSEI risk | | | | | | | |
| --- | --- | --- | --- | --- | --- | --- | --- | --- | --- |
| NAICS | Sector name | RSEI share | RSEI score | Chromium | Ethylene oxide | Cobalt | Nickel | Arsenic | Others |
| 311-312 | Food and beverage and tobacco product manufacturing | 0.13% | 26,870 | 0 | 26,357 | 0 | 0 | 0 | 514 |
| 313-314 | Textile mills and textile product mills | 0.00% | 0 | 0 | 0 | 0 | 0 | 0 | 0 |
| 315-316 | Apparel, leather, and allied product manufacturing | 0.00% | 0 | 0 | 0 | 0 | 0 | 0 | 0 |
| 321 | Wood product manufacturing | 0.08% | 16,711 | 41 | 0 | 0 | 0 | 2,256 | 14,413 |
| 322 | Paper manufacturing | 1.85% | 385,975 | 0 | 0 | 2,408 | 107,670 | 0 | 275,897 |
| 323 | Printing and related support activities | 0.00% | 0 | 0 | 0 | 0 | 0 | 0 | 0 |
| 324 | Petroleum and coal products manufacturing | 3.08% | 641,532 | 33,714 | 0 | 131,027 | 155,615 | 0 | 321,176 |
| 325 | Chemical manufacturing | 93.48% | 19,462,673 | 374,912 | 9,456,666 | 286,638 | 173,037 | 80,474 | 9,090,947 |
| 326 | Plastics and rubber products manufacturing | 0.00% | 10 | 0 | 0 | 0 | 0 | 0 | 10 |
| 327 | Nonmetallic mineral product manufacturing | 0.00% | 249 | 0 | 0 | 0 | 0 | 0 | 249 |
| 331 | Primary metal manufacturing | 0.02% | 3,509 | 1,441 | 0 | 0 | 1,051 | 0 | 1,017 |
| 332 | Fabricated metal product manufacturing | 1.16% | 240,906 | 172,355 | 0 | 104 | 6,676 | 0 | 61,770 |
| 333 | Machinery manufacturing | 0.17% | 34,607 | 32,556 | 0 | 0 | 2,035 | 0 | 16 |
| 334 | Computer and electronic product manufacturing | 0.00% | 0 | 0 | 0 | 0 | 0 | 0 | 0 |
| 335 | Electrical equipment, appliance, and component manufacturing | 0.00% | 0 | 0 | 0 | 0 | 0 | 0 | 0 |
| 3361-3363 | Motor vehicles, bodies and trailers, and parts manufacturing | 0.00% | 0 | 0 | 0 | 0 | 0 | 0 | 0 |
| 3364-3369 | Other transportation equipment manufacturing | 0.03% | 6,105 | 5,590 | 0 | 0 | 232 | 0 | 284 |
| 337 | Furniture and related product manufacturing | 0.00% | 0 | 0 | 0 | 0 | 0 | 0 | 0 |
| 339 | Miscellaneous manufacturing | 0.00% | 0 | 0 | 0 | 0 | 0 | 0 | 0 |

**Table S5**. RSEI risk of industrial sectors in Pennsylvania

|  | | RSEI risk | | | | | | | |
| --- | --- | --- | --- | --- | --- | --- | --- | --- | --- |
| NAICS | Sector name | RSEI share | RSEI score | Chromium | Ethylene oxide | Cobalt | Nickel | Arsenic | Others |
| 311-312 | Food and beverage and tobacco product manufacturing | 0.06% | 11,203 | 0 | 0 | 0 | 0 | 0 | 11,203 |
| 313-314 | Textile mills and textile product mills | 0.00% | 0 | 0 | 0 | 0 | 0 | 0 | 0 |
| 315-316 | Apparel, leather, and allied product manufacturing | 0.00% | 0 | 0 | 0 | 0 | 0 | 0 | 0 |
| 321 | Wood product manufacturing | 0.08% | 14,791 | 0 | 0 | 0 | 0 | 0 | 14,791 |
| 322 | Paper manufacturing | 0.33% | 64,754 | 0 | 0 | 0 | 3,243 | 0 | 61,511 |
| 323 | Printing and related support activities | 0.00% | 905 | 0 | 0 | 0 | 0 | 0 | 905 |
| 324 | Petroleum and coal products manufacturing | 6.37% | 1,250,590 | 0 | 0 | 0 | 302,434 | 0 | 948,155 |
| 325 | Chemical manufacturing | 7.90% | 1,550,988 | 1,061,236 | 127,419 | 35,021 | 29,160 | 0 | 298,153 |
| 326 | Plastics and rubber products manufacturing | 0.49% | 96,566 | 81,724 | 0 | 0 | 5,199 | 0 | 9,644 |
| 327 | Nonmetallic mineral product manufacturing | 25.68% | 5,042,224 | 4,799,968 | 0 | 210,461 | 9,803 | 0 | 21,992 |
| 331 | Primary metal manufacturing | 13.15% | 2,582,789 | 1,195,855 | 0 | 404,877 | 626,976 | 0 | 355,081 |
| 332 | Fabricated metal product manufacturing | 15.05% | 2,955,543 | 2,736,613 | 0 | 11,426 | 189,313 | 0 | 18,191 |
| 333 | Machinery manufacturing | 8.03% | 1,577,280 | 1,457,355 | 0 | 22,509 | 93,238 | 0 | 4,177 |
| 334 | Computer and electronic product manufacturing | 0.00% | 763 | 0 | 0 | 0 | 75 | 0 | 688 |
| 335 | Electrical equipment, appliance, and component manufacturing | 0.10% | 19,306 | 14 | 0 | 0 | 3 | 1,944 | 17,345 |
| 3361-3363 | Motor vehicles, bodies and trailers, and parts manufacturing | 0.40% | 78,877 | 66,280 | 0 | 290 | 345 | 0 | 11,962 |
| 3364-3369 | Other transportation equipment manufacturing | 0.91% | 178,067 | 125,501 | 0 | 2,639 | 40,093 | 0 | 9,834 |
| 337 | Furniture and related product manufacturing | 0.31% | 60,630 | 39,366 | 0 | 0 | 17,974 | 0 | 3,290 |
| 339 | Miscellaneous manufacturing | 21.13% | 4,149,684 | 107,774 | 3,947,933 | 23,180 | 1,250 | 0 | 69,547 |
